# Supplementary material for: Parental care experiences of children with postoperative fracture pain from the perspective of Family-Centered Care and Health Belief Model: a qualitative study
Source: Research Square preprint supplement (doi:10.21203/rs.3.rs-7795601/v1), 2025-11-18
Supplement: Supplementary file 1 [file f68c5fad6d5fcf6849c61fca.docx]

**The Formal Interview Outline**

The contents of the formal interview outline included the following questions:

1. What specific behaviors did you observe when your child experienced pain post-surgery?
2. What specific actions do you typically take to alleviate his/her pain, and how effective are they?
3. Do medical staff actively seek your opinions or suggestions during pain management? If so, how were you involved? If not, what do you believe are the reasons for this?
4. What difficulties or challenges have you faced in participating in your child's pain management?
5. How have these difficulties affected your emotional state or caregiving behavior?
6. What specific assistance would you like medical staff to provide regarding pain management?
